# Supplementary material for: Weight Gain Trajectories Associated With Elevated C‐Reactive Protein Levels in Chinese Adults
Source: PubMed Central journal article supplement — J Am Heart Assoc. 2016 Sep 16;5(9):e003262. doi: 10.1161/JAHA.116.003262 (PMC5079008; doi:10.1161/jaha.116.003262), 2016-09-16
Supplement: JAH3-5-e003262-s001.pdf [file JAH3-5-e003262-s001.pdf]

## SUPPLEMENTAL MATERIAL

**Table S1. Missingness for the Analytic Sample**

|                            | <b>Included</b>         | <b>Excluded</b><br><b>(subjects with at least</b><br><b>one adult measurement</b><br><b>less than 66 in 2009</b><br><b>with no trajectory, or</b><br><b>pregnant, CRP missing,</b><br><b>or CRP&gt;10)</b> | <b>p-value</b> |
|----------------------------|-------------------------|------------------------------------------------------------------------------------------------------------------------------------------------------------------------------------------------------------|----------------|
|                            | <b>N=5536</b>           | <b>N=2613</b>                                                                                                                                                                                              |                |
| 2009 Age                   | 48.8 ( 40.6 – 56.6 )    | 38.9 ( 26.4 – 51.5 )                                                                                                                                                                                       | <0.0001        |
| Baseline Weight            | 56.3 ( 50.9 – 63.4 )    | 59.0 ( 52.0 – 66.3 )                                                                                                                                                                                       | <0.0001        |
| Ave Adult Ht               | 160.9 ( 155.8 – 167.0 ) | 162.8 ( 157.0 – 169.5 )                                                                                                                                                                                    | <0.0001        |
| Total HH Income            | 32264 ( 17820 – 55067 ) | 32543 ( 19374 – 53277 )                                                                                                                                                                                    | 0.4418         |
| 2009 Urbanization<br>Index | 61.0 ( 50.6 – 83.0 )    | 75.5 ( 54.1 – 89.1 )                                                                                                                                                                                       | <0.0001        |
| Ever Smoke                 |                         |                                                                                                                                                                                                            | 0.0014         |
|                            | 0                       | 68.0% (3762)                                                                                                                                                                                               | 42.8% (1119)   |
|                            | 1                       | 32.0% (1770)                                                                                                                                                                                               | 16.4% (429)    |
| Missing                    |                         | 0.1% (4)                                                                                                                                                                                                   | 40.8% (1065)   |

Table S2: Distribution of Baseline Wave by Age-Sex Strata

|               | Baseline Wave |             |           |             |             |             |           |
|---------------|---------------|-------------|-----------|-------------|-------------|-------------|-----------|
|               | N             | 1991        | 1993      | 1997        | 2000        | 2004        | 2006      |
| <b>F18-30</b> | 936           | 39.3% (368) | 8.0% (75) | 20.5% (192) | 14.3% (134) | 10.4% (97)  | 7.5% (70) |
| <b>F30-40</b> | 1069          | 51.9% (555) | 4.5% (48) | 16.8% (180) | 10.5% (112) | 9.8% (105)  | 6.5% (69) |
| <b>F40-66</b> | 895           | 40.1% (359) | 2.7% (24) | 19.1% (171) | 13.6% (122) | 16.2% (145) | 8.3% (74) |
| <b>M18-30</b> | 928           | 41.1% (381) | 9.9% (92) | 21.0% (195) | 11.0% (102) | 9.2% (85)   | 7.9% (73) |
| <b>M30-40</b> | 857           | 52.2% (447) | 5.3% (45) | 17.6% (151) | 10.6% (91)  | 9.8% (84)   | 4.6% (39) |
| <b>M40-66</b> | 851           | 37.7% (321) | 5.3% (45) | 19.2% (163) | 13.2% (112) | 16.2% (138) | 8.5% (72) |

**(a)** Predicted Probability of CRP>2  
Men  $\geq 18$  and  $<30$  years of mean baseline weight

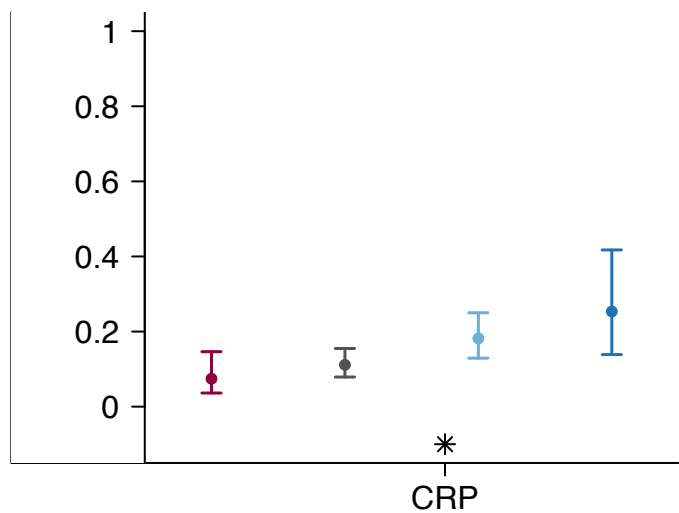

**(c)** Men  $\geq 30$  and  $<40$  years of mean baseline weight

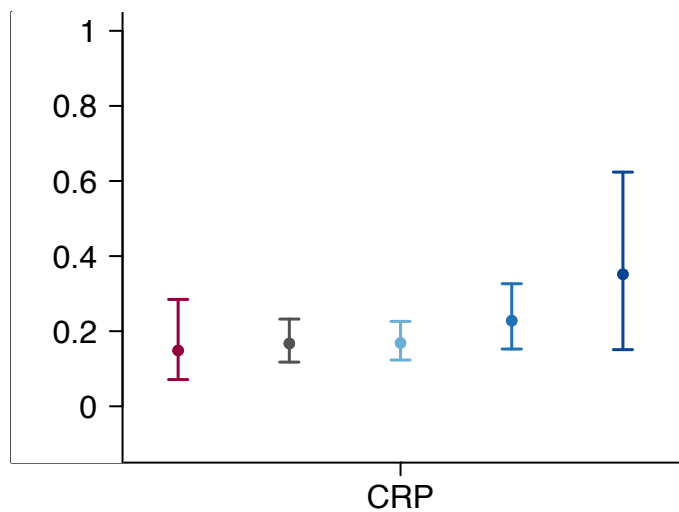

**(e)** Men  $\geq 40$  and  $<66$  years of mean baseline weight

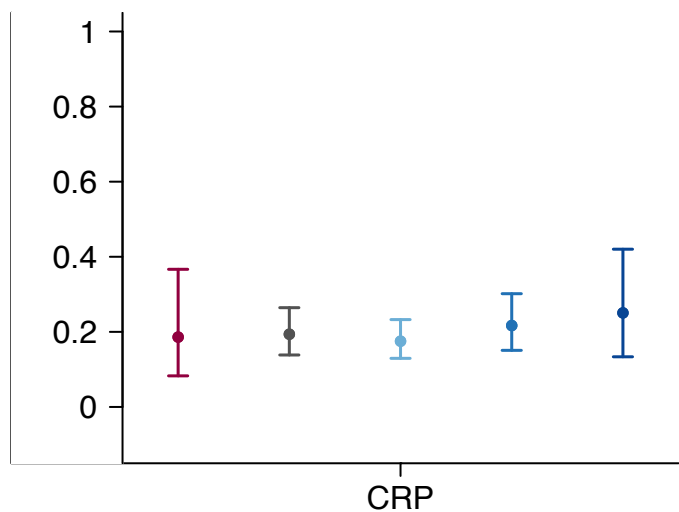

**(b)** Weight Trajectory Summaries

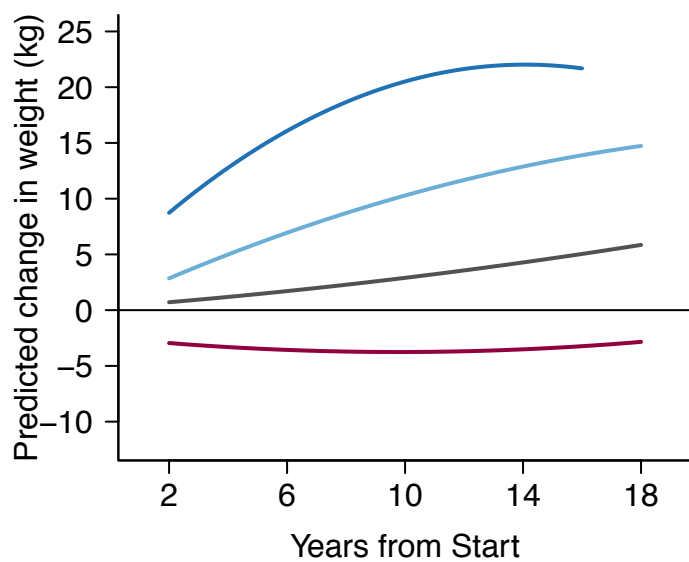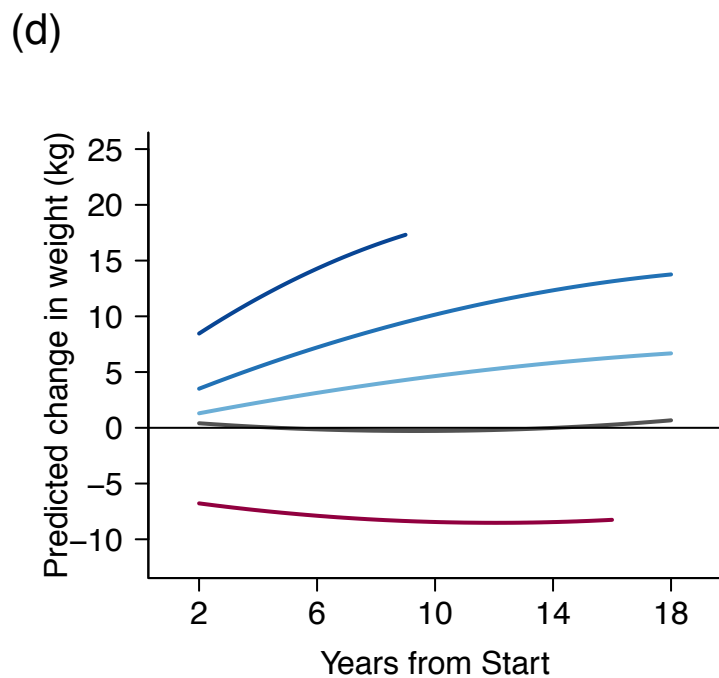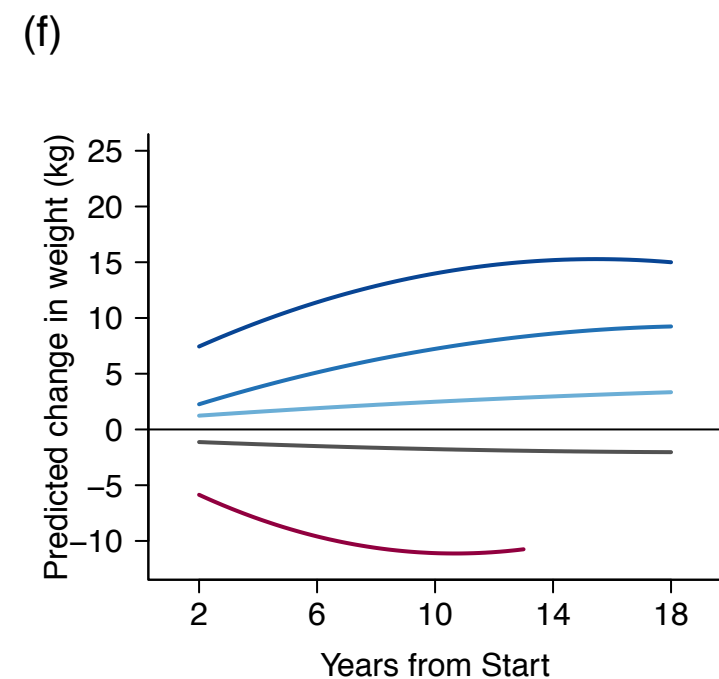

1 2 3 4  
8.8% 59.4% 27.3% 4.5%

1 2 3 4 5  
5.5% 42.6% 36.0% 14.1% 1.8%

1 2 3 4 5  
3.2% 30.5% 45.9% 16.1% 4.2%

### (a) Predicted Probability of CRP>2

Women  $\geq 18$  and  $<30$  years of mean baseline weight

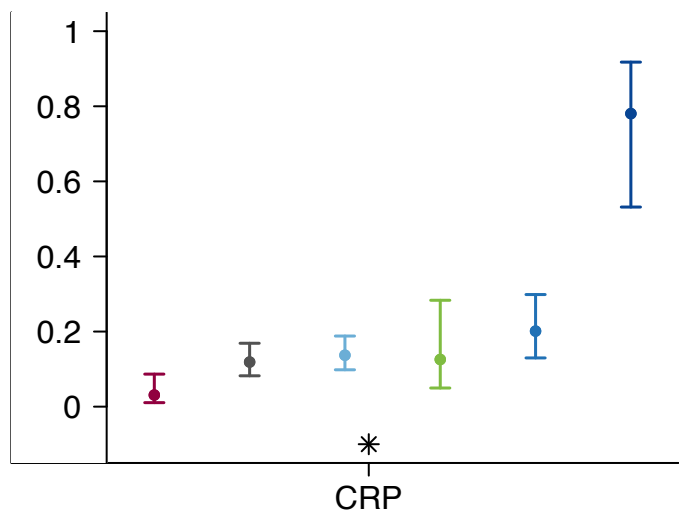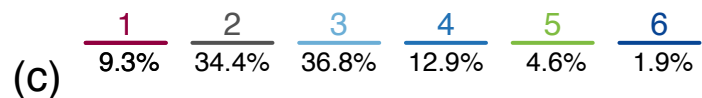

### (c) Predicted Probability of CRP>2

Women  $\geq 30$  and  $<40$  years of mean baseline weight

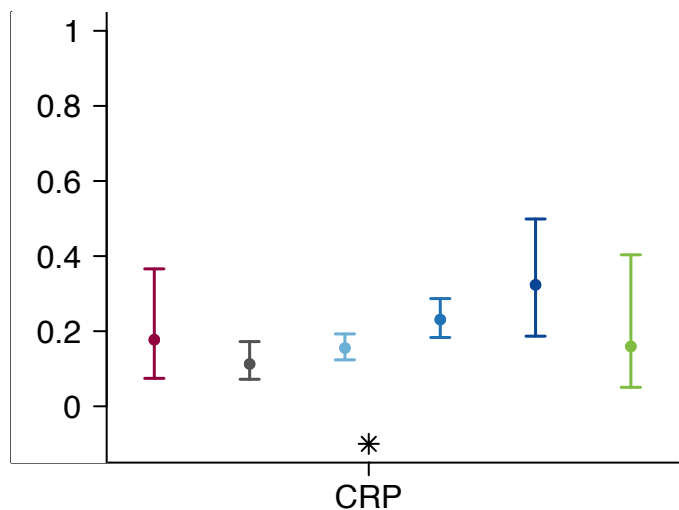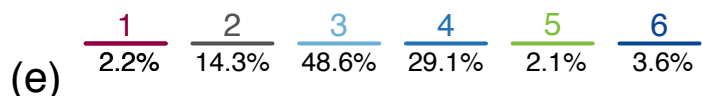

### (e) Predicted Probability of CRP>2

Women  $\geq 40$  and  $<66$  years of mean baseline weight

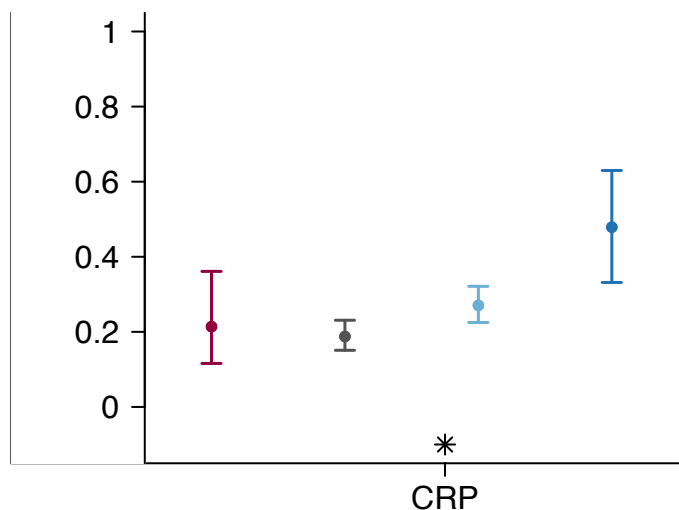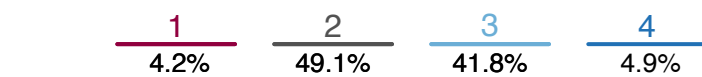

### (b) Weight Trajectory Summaries

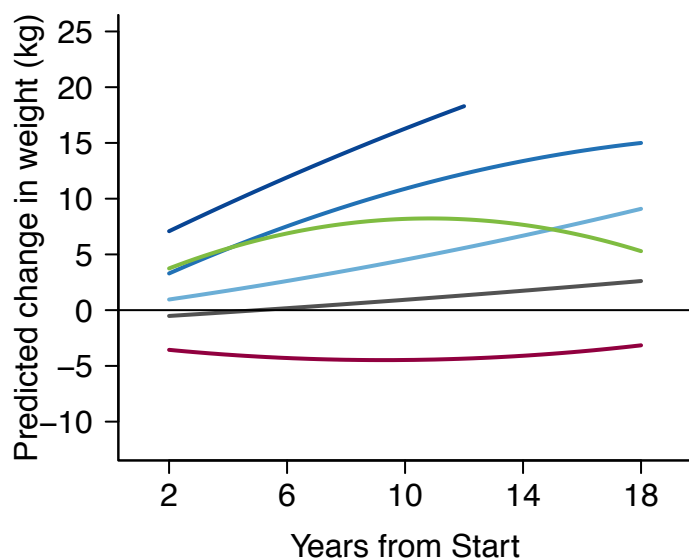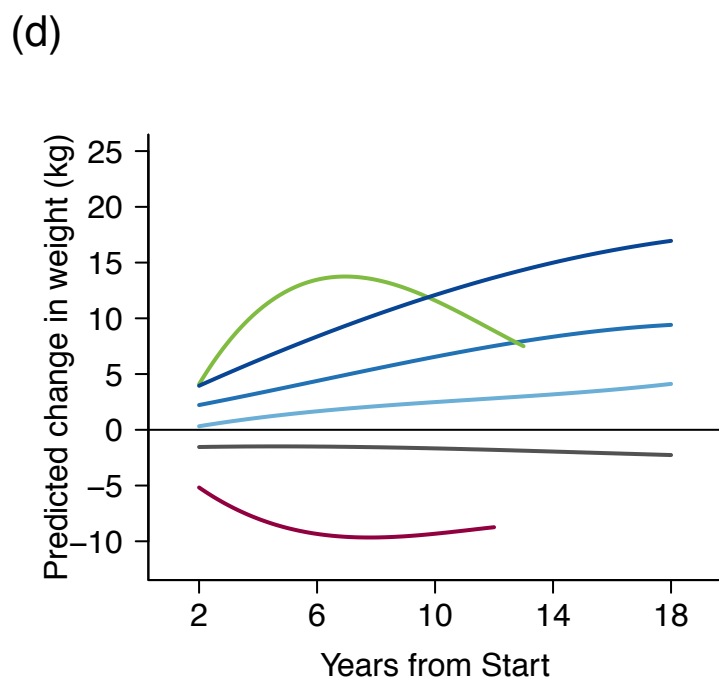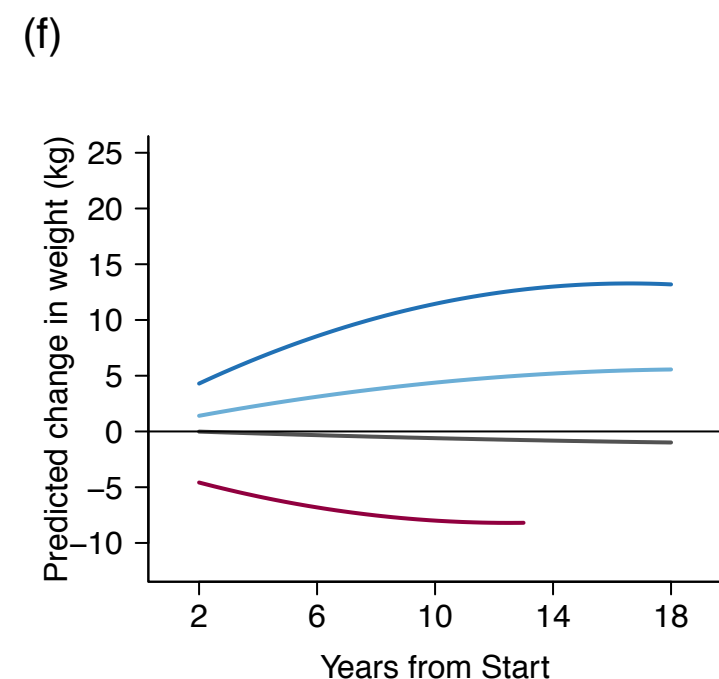

# Women

# Men

$\geq 18$  to  $<30$

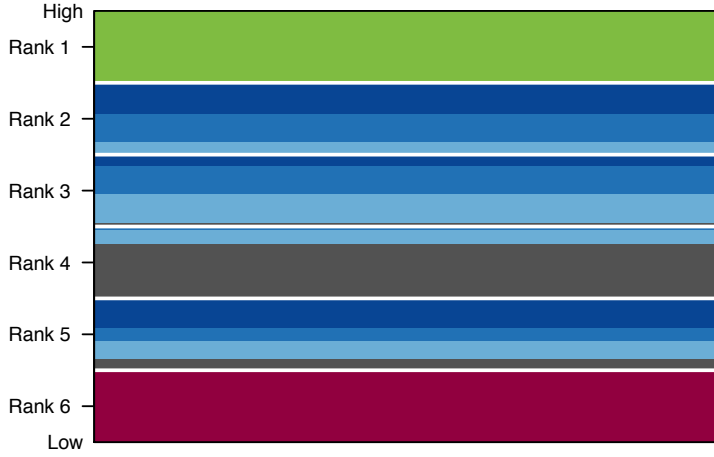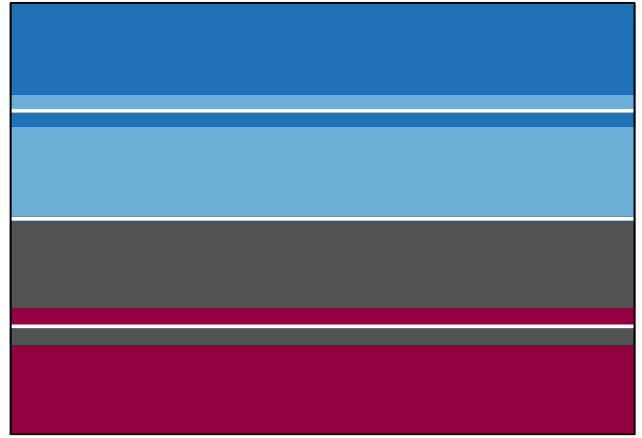

$\geq 30$  to  $<40$

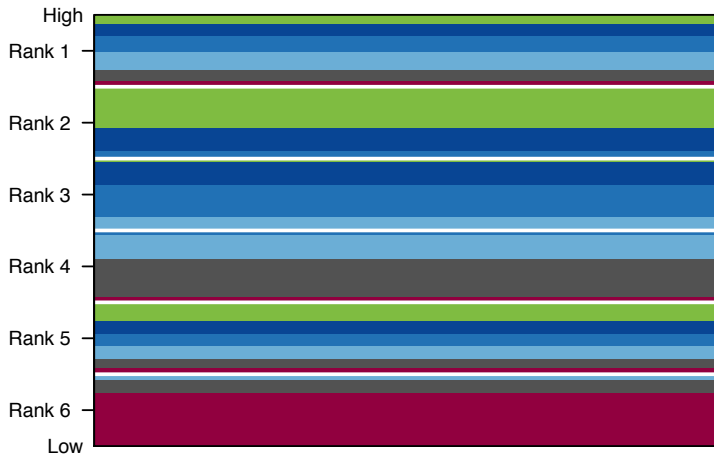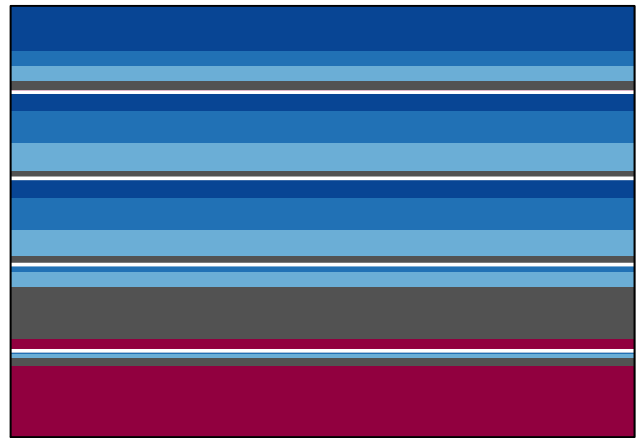

$\geq 40$  to  $<66$

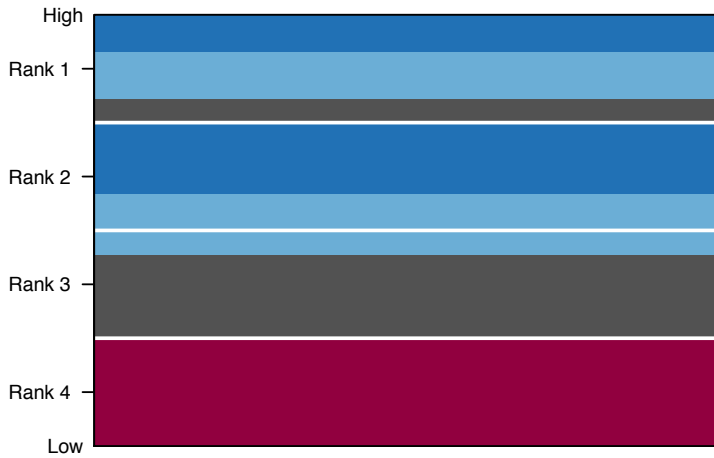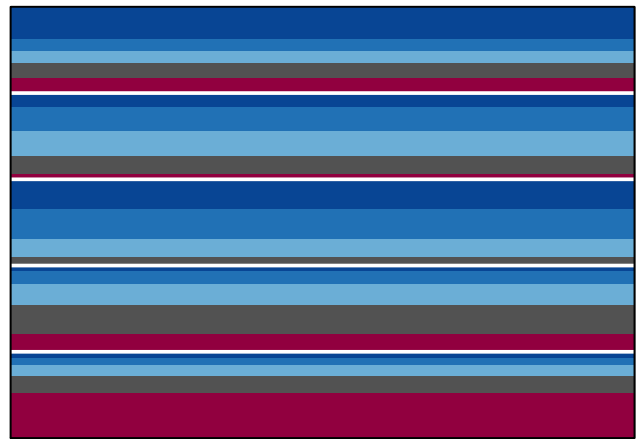

### **Supplemental Figure Legends:**

**Figure S1:** Predicted percent ( $\pm$  95% confidence interval) with elevated hs-CRP by corresponding weight change trajectory across three age strata in men, excluding those taking medications with anti-inflammatory properties. Expected percent ( $\pm$  95% confidence interval) is presented for each age strata from left to right corresponding to the relative level of weight change in the color-matched trajectory. The number of participants in each class is presented at the bottom of each figure. Significant effects of the trajectories are indicated with an asterisk.

**Figure S2:** Predicted percent ( $\pm$  95% confidence interval) with elevated hs-CRP by corresponding weight change trajectory across three age strata in women, excluding those taking medications with anti-inflammatory properties. Expected percent ( $\pm$  95% confidence interval) is presented for each age strata from left to right corresponding to the relative level of weight change in the color-matched trajectory. The number of participants in each class is presented at the bottom of each figure. Significant effects of the trajectories are indicated with an asterisk.

**Figure S3:** Relative rank of weight trajectories for elevated CRP risk across sex and age strata, results from a simulation study. Results from a simulation based on random sampling from normal distributions for each trajectory class in each age–sex strata, centered at the trajectory–specific estimates of risk of elevated CRP and their respective variances. Ranks of the trajectory groups were recorded with rank 1 given to the trajectory class with the highest estimated risk of elevated CRP. This process was repeated 10000 times and the frequency of each ranking shown with color coding matching the trajectory figures in Figures 1 and 2, according to the frequency that each

age–sex–specific trajectory class was assigned a particular rank ranging from low values to high values of risk of elevated CRP.
